# The American Journal of Psychiatry

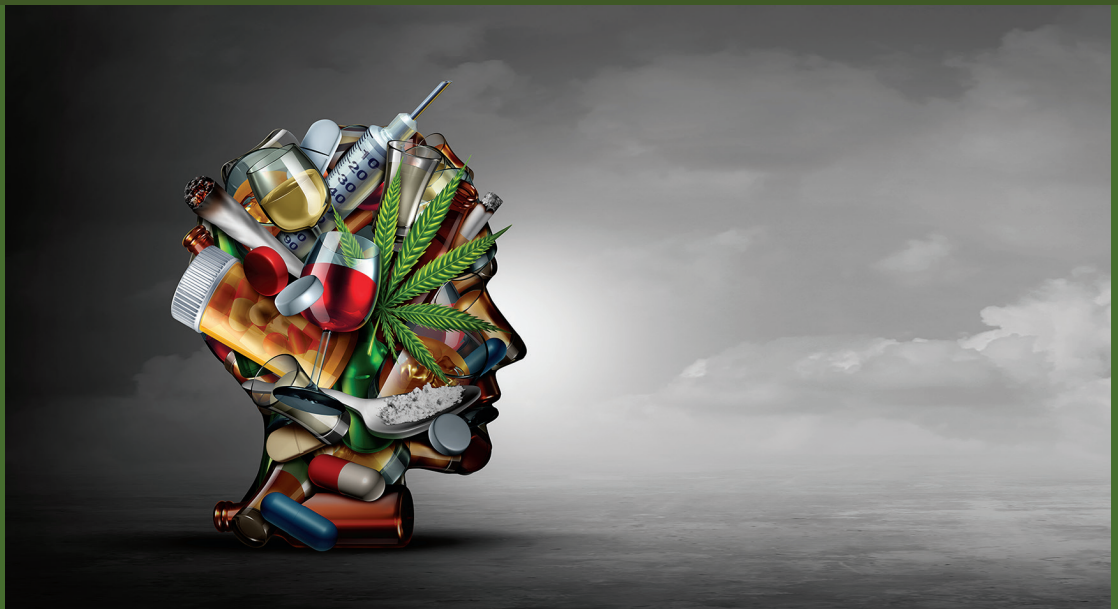

Opioid Use Disorder, Cannabis Use Disorder, and a Mindfulness  
Intervention Affecting Pain-Related Neural Substrates

Opioid Use Disorder: Pernicious and Persistent

Flexible Buprenorphine/Naloxone Model of Care for Reducing  
Opioid Use in Individuals With Prescription-Type  
Opioid Use Disorder

Trends in Cannabis Use Disorder Diagnoses in the  
U.S. Veterans Health Administration, 2005–2019
