# TMS Therapy Was Searched Online Thousands of Times in the Last Month.

## Be ready when patients ask you about it.

Patients and their families are savvy consumers. Just like you, they research ways to solve their problems. And when antidepressants don't work, they search for alternative therapies. Be ready to say yes when they ask you if you provide TMS.

MagVenture Transcranial Magnetic Stimulation (TMS) for Major Depressive Disorder<sup>1</sup>:

- ✓ Delivers a 49% response rate and 32% remission rate\* for MDD after failure of two or more antidepressants<sup>2</sup>
- ✓ Reimbursed by most insurance companies
- ✓ NO per-use treatment fees back to the manufacturer
- ✓ Non-invasive, no anesthesia, and does not affect cognitive function
- ✓ Safe technique: most common side effects include mild discomfort and transient headache
- ✓ Can pay for itself with just ONE patient per month<sup>3</sup>

Scan to get in touch:

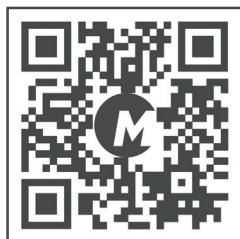

Our systems are used at prolific and highly showcased TMS services across the U.S. Let's get one in your practice.

1. MagVenture Transcranial Magnetic Stimulation (TMS) Therapy is indicated for the treatment of major depressive disorder (MDD) in adult patients who have failed to receive satisfactory improvement from prior antidepressant medication in the current episode.  
2. Blumberger DM, Vila-Rodriguez F, Thorpe KE, et al. *Lancet*. 2018 Apr 28;391(10131):1683-1692.  
3. Assuming 60-month financing, a monthly payment of \$2,000, and reimbursement at \$115 per session. Standard 36-session depression protocol.

\* The response rate is defined by a  $\geq 50\%$  reduction from baseline of depressive symptoms on the HRSD-17 scale.

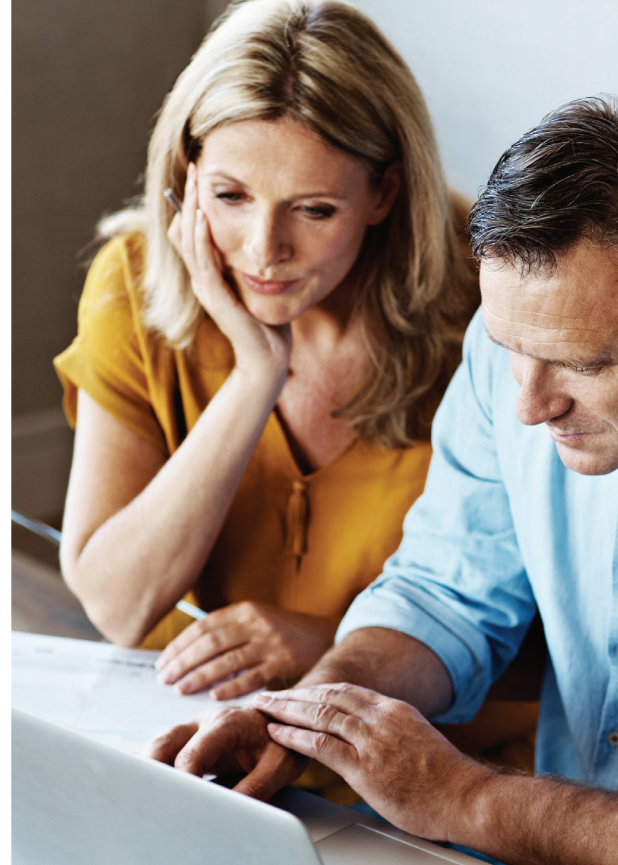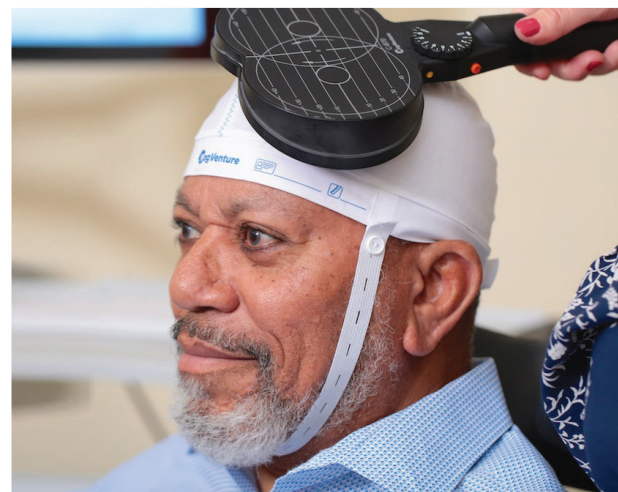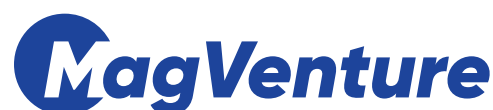

PERMANENTE MEDICINE®

## Why work at Kaiser Permanente?

- Market-leading benefits
- Flexibility for a work/life balance
- Physician-led, physician-friendly environment
- No RVUs
- Practice medicine in a culture that is collaborative, inclusive, and supported by technology

**Visit us at AACAP in Toronto - Booth #205!**

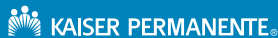

permanente.org

If you believe that  
Psychiatry is not only  
a career, but your calling,  
then you belong with us.

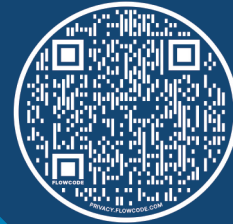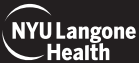

NYU Grossman School of Medicine  
Continuing Medical Education

## Update on Attention Deficit Hyperactivity Disorder Through the Lifespan SATURDAY, DECEMBER 3, 2022 VIRTUAL WEBINAR

### COURSE DIRECTORS

Lenard A. Adler, MD  
Richard Gallagher, PhD

### KEYNOTE SPEAKER

Margaret Sibley, PhD

### SPEAKERS

David W. Goodman, MD  
Rahil R. Jummani, MD  
Frances R. Levin, MD  
John Mitchell, PhD

### TARGET AUDIENCE

Physicians, Psychologists,  
and Nurses

### TOPICS OF INTEREST

- Sluggish Cognitive Tempo in Children and Adults
- New Treatments of ADHD Through the Lifespan – Focus on Mindfulness
- ADHD and Substance Use
- Co-morbid Conditions in ADHD
- Diagnosis of ADHD in Older Adults
- Exposure to Systemic Viruses and ADHD Symptoms
- Lunchtime Ask the Experts Session

This activity has been approved for *AMA PRA Category 1 Credit™*

### PSYCHOLOGY CREDITS

NYU Langone Health/NYU Grossman School of Medicine is recognized by the New York State Education Department's State Board for Psychology as an approved provider of continuing education for Licensed Psychologists #PSY-0085.

Provided by NYU Grossman School of Medicine  
Organized by the Departments of Psychiatry and Child and Adolescent Psychiatry at NYU Grossman School of Medicine

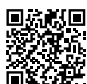

WEBSITE  
AND TO  
REGISTER

PSYCHIATRIC  
NEWS

BRIEF

## Enable Psychiatric News Brief

With the American Psychiatric Association's new flash briefing, *Psychiatric News Brief*, you can now listen to synopses of curated articles from *Psychiatric News*. Simply enable this skill and you can listen anytime you choose throughout your day by just saying "Alexa, what's my flash briefing" or "Alexa, tell me what's new".

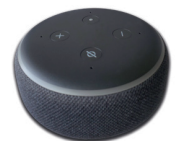

Flash briefing is a customizable Amazon skill that includes updates from your favorite content services. When you say, "Alexa, what's my flash briefing?" or "Alexa, what's the news," you'll hear updates from any organization that you have enabled.

Go to [psychnews.psychiatryonline.org/alexa](https://psychnews.psychiatryonline.org/alexa) to sign up now!

AMERICAN  
PSYCHIATRIC  
ASSOCIATION  
PUBLISHING

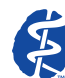

www.appi.org  
Email: [appi@psych.org](mailto:appi@psych.org)  
Phone: 1-800-368-5777

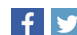



Searching for  
the perfect  
psychiatric  
career?

## Let APA JobCentral help!

### Manage Your Career

- Browse hundreds of active job listings!
- Create an account to save jobs, store multiple resumes and cover letters and communicate with employers through our internal messaging system.
- Set up multiple job alerts specifying your skills, interests and location to receive e-mails when employers post jobs that match your criteria.

### Recruit for Open Positions

- Post your job in front of thousands of highly qualified psychiatrists.
- Cross promote your job listing in Psychiatric News.
- Search the anonymous resume database to find your ideal candidate.

AMERICAN  
**PSYCHIATRIC**  
ASSOCIATION

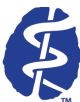

**JOBCENTRAL**  
The Career Hub for Psychiatry

[jobs.psychiatry.org](https://jobs.psychiatry.org)

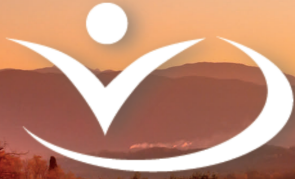

# Interior Health

## PSYCHIATRY OPPORTUNITIES

TRAIL, CRANBROOK, NELSON, KAMLOOPS, KELOWNA + OTHER COMMUNITIES  
BRITISH COLUMBIA, CANADA 

Interior Health is seeking Psychiatrists to join our team across the beautiful southern interior of British Columbia, Canada. Explore your passions at work, while living with an abundance of recreational activities to suit your lifestyle.

Our health authority offers diverse psychiatry employment opportunities in geriatrics, child & adolescent, general adult and neuro psychiatry.

Our communities feature some of the best weather conditions in Canada, with over 2,000 hours of sunshine annually. Further your psychiatry career and join a passionate team of highly motivated individuals here at Interior Health. It's better here.

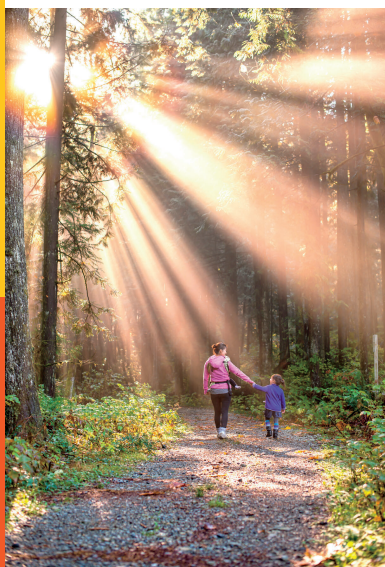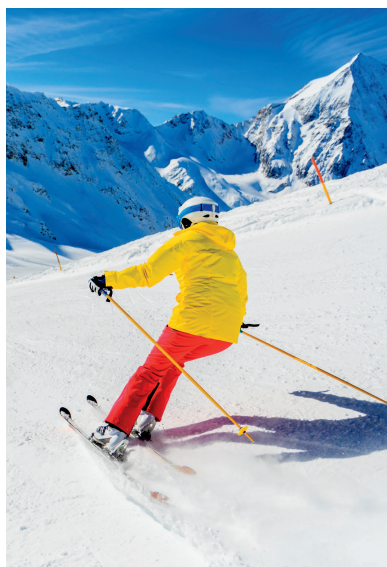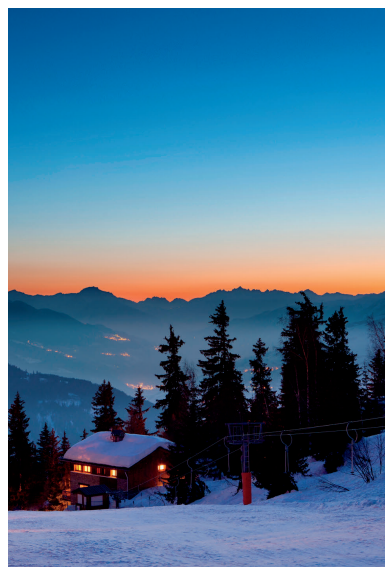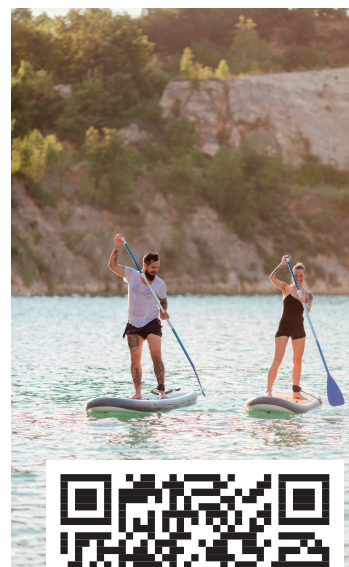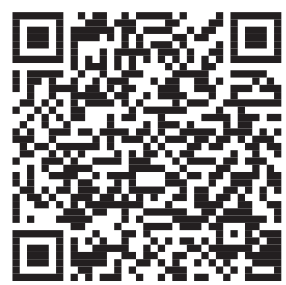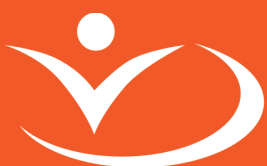

 [PhysicianRecruitment@interiorhealth.ca](mailto:PhysicianRecruitment@interiorhealth.ca)

 [betterhere.ca](http://betterhere.ca)

SCAN TO VIEW JOBS
